# Supplementary material for: The Influence of Parathyroidectomy on Osteoporotic Fractures in Kidney Transplant Recipients: Results from a Retrospective Single-Center Trial
Source: MDPI journal article supplement (doi:10.3390/jcm11030654), 2022-01-27
Supplement: s1 [file s1]

## Supplements:

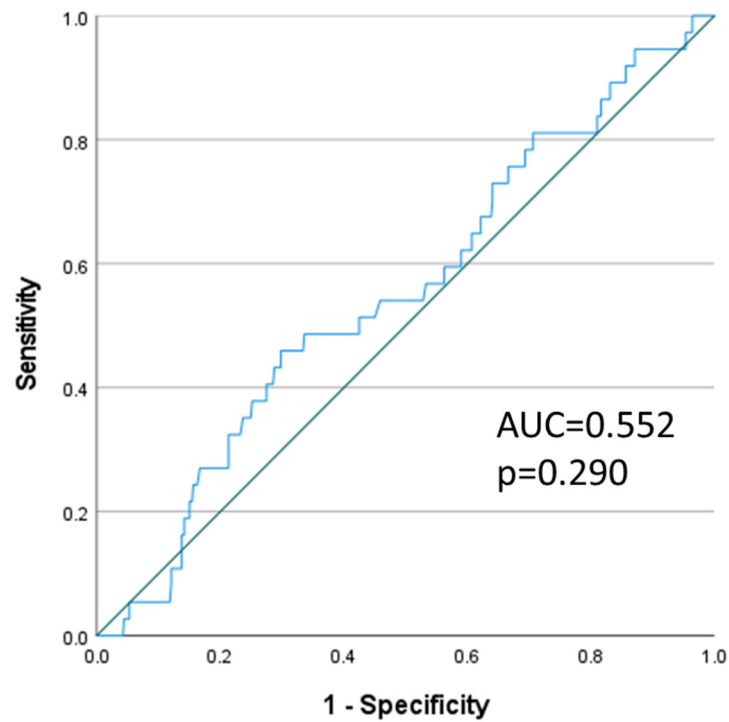

**Figure S1.** ROC-analysis for PTH levels three months after KTx and fracture occurrence. Based on this, we could not support a cut-off for  $\text{PTH} \geq 130$  pg/mL being associated with an increased fracture risk.
